# Supplementary material
Source: PubMed Central journal article supplement (PMC3462582)
Supplement: supp_74.21.1732_Shekleton.pdf [file supp_74.21.1732_Shekleton.pdf]

## 외상성 뇌손상 이후의 수면장애와 멜라토닌양

### Sleep disturbance and melatonin levels following traumatic brain injury

I.A. Shekleton, BNSc (Hons)  
D.J. Parcell, DPsych  
I.R. Redman, PhD  
I. Phippos-Nelson, BSc (Hons)  
I.L. Ponsford, PhD  
S.M.W. Rajaratnam, PhD

**목적:** 수면장애(sleep disturbance)는 외상성 뇌손상(traumatic brain injury, TBI) 이후에 흔히 발생하며, 이로 인하여 생활의 장애가 유발된다. 그러나, 수면다원검사(polysomnography)를 시행하여 수면의 질과 수면 구조에 어떠한 변화가 있는지를 명확히 밝혀지는 못하였다. 수면장애의 가능한 원인으로는 수면-각성의 일주기 조절의 장애, 심리적 고통, 손상에 대한 신경 반응을 들 수 있겠다. 저자들은 TBI 환자군에서 수면-각성장애와 기저 메커니즘에 대하여 연구하고자 하였다.

**방법:** 이 연구는 23명의 TBI 환자(429.7 ± 287.6 days post injury)와 23명의 연령, 성별을 맞춘 건강한 자원자를 대상으로 수면다원검사를 시행하여 다양한 수면 지수, salivary dim light melatonin onset (DLMO) 시간, 자가 진단한 수면의 질, 불안, 우울 정도를 측정하였다.

**결과:** TBI 환자들은 대조군에 비해 더 많은 불안, 우울 증상, 수면장애를 호소하였다. TBI 환자들은 수면 효율(sleep efficiency, SE)의 저하와 wake after sleep onset (WASO: 자다가 중간에 깨어있었던 시간)의 증가를 보였다. 수면 구조에 있어서는 두 그룹 간에 뚜렷한 차이를 보이지 않았지만, 불안과 우울 점수를 통제하게 되면 TBI 환자들에서 서파수면(slow wave sleep)이 더 많은 것을 볼 수 있다. 자가 진단한 수면 시간이나 DLMO 시간은 두 그룹에서 차이가 없었다. 그러나, TBI 환자들은 저녁 멜라토닌(melatonin) 분비량이 현저히 더 낮았다. 멜라토닌양은 SE나 WASO가 아닌, REM 수면과 뚜렷한 연관을 보였다.

**결론:** 저녁 멜라토닌 분비의 감소는 멜라토닌 합성의 일주기 조절의 장애를 의미할 수 있다. 이 연구의 결과는 TBI 환자에서 수면장애를 유발하는 최소 두 가지 요인이 있다는 것을 시사한다. 우울감의 상승은 수면의 질 감소와 연관이 있으며, 서파수면의 증가는 기계적 뇌 손상의 영향에 기인한다.

Neurology® 2010;74:1732-1738

Figure Melatonin levels for traumatic brain injury (TBI) and control groups

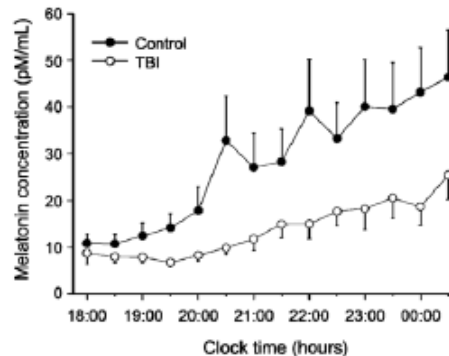

Mean (± SE) salivary melatonin levels were calculated for patients with TBI and controls every half hour during the sampling period (18:00 hours to 00:30 hours). The control group had higher melatonin output across the sampling period than the TBI group ( $p = 0.031$ ).
